# Supplementary material for: Lysosome-targetable polythiophene nanoparticles for two-photon excitation photodynamic therapy and deep tissue imaging
Source: Royal Society of Chemistry journal article supplement (doi:10.1039/c7tb00371d), 2017-01-01
Supplement: c7tb00371d1.pdf [file c7tb00371d1.pdf]

Electronic Supplementary Material (ESI) for Journal of Materials Chemistry B.  
This journal is © The Royal Society of Chemistry 2017

### **Electronic Supplementary Information (ESI)**

#### **Lysosome-targetable polythiophene nanoparticles for two-photon excitation photodynamic therapy and deep tissue imaging**

**Shaojing Zhao,<sup>b,†</sup> Guangle Niu,<sup>c,d,†</sup> Feng Wu,<sup>a,†</sup> Li Yan,<sup>b</sup> Hongyan Zhang,<sup>c</sup> Junfang Zhao,<sup>c</sup>  
Lintao Zeng<sup>\*a</sup> and Minhuan Lan<sup>\*b</sup>**

<sup>a</sup> Tianjin Key Laboratory of Organic Solar Cells and Photochemical Conversion,  
School of Chemistry & Chemical Engineering, Tianjin University of Technology,  
Tianjin, China. E-mail: zlt1981@126.com

<sup>b</sup> Center Of Super-Diamond and Advanced Films (COSDAF) & Department of  
Physics and Materials Science, City University of Hong Kong, Hong Kong SAR,  
China. E-mail: minhulan@cityu.edu.hk

<sup>c</sup> Key Laboratory of Photochemical Conversion and Optoelectronic Materials,  
Technical Institute of Physics and Chemistry (TIPC), Chinese Academy of Sciences  
(CAS), Beijing, China

<sup>d</sup> Department of Chemistry, Division of Life Science, The Hong Kong University of  
Science and Technology, Clear Water Bay, Kowloon, Hong Kong SAR, China.

† These authors contributed equally.

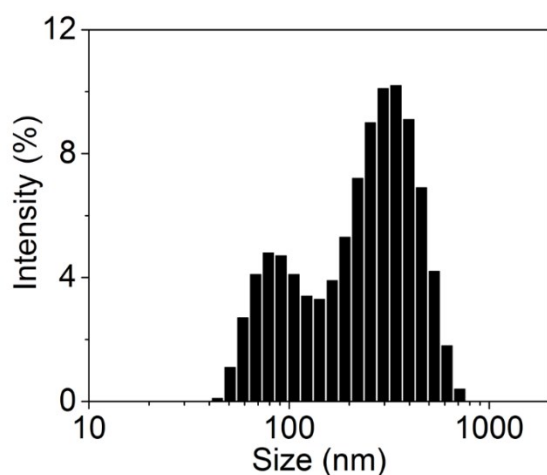

**Figure S1.** The DLS measurement of the PT NPs aqueous solution.

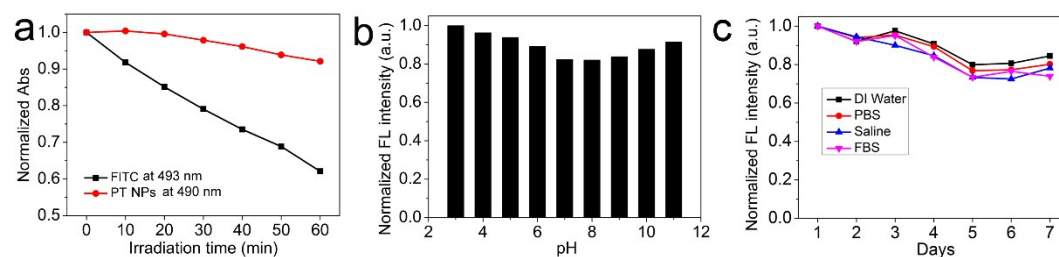

**Figure S2.** (a) Photostability of PT NPs and commercial fluorescein dye (Fluorescein isothiocyanate, FITC) in aqueous solution. All samples were continuously irradiated by using a 500 W xenon lamp. Absorbance was normalized. (b) Effect of pH on the FL intensity at 560 nm of PT NPs aqueous solution. (c) Fluorescence stability of PT NPs under different conditions. The fluorescence intensity of PT NPs at 560 nm was normalized.

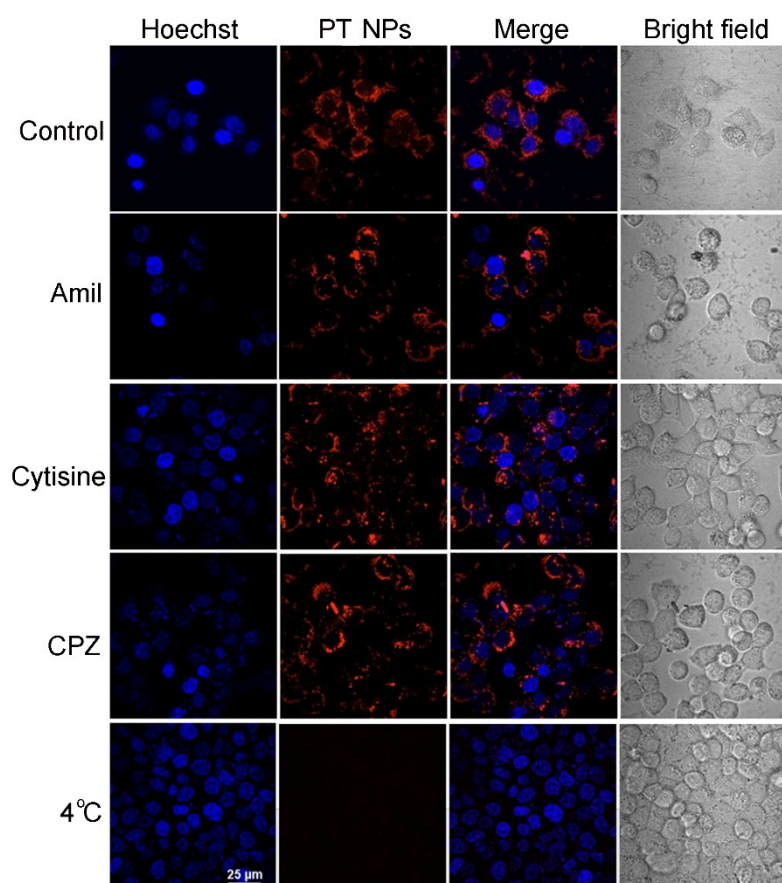

**Figure S3.** Confocal microscopy images displaying intracellular uptake of PT NPs (red fluorescence). The cell nuclei were stained by Hoechst and were shown in blue.

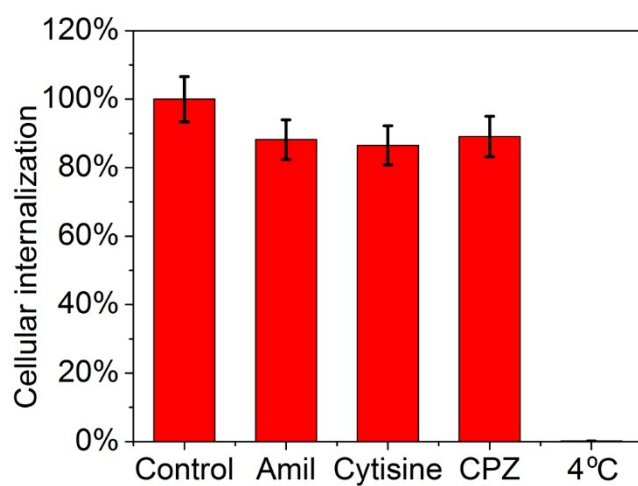

**Figure S4.** The intracellular uptake efficiency of PT NPs in different condition.

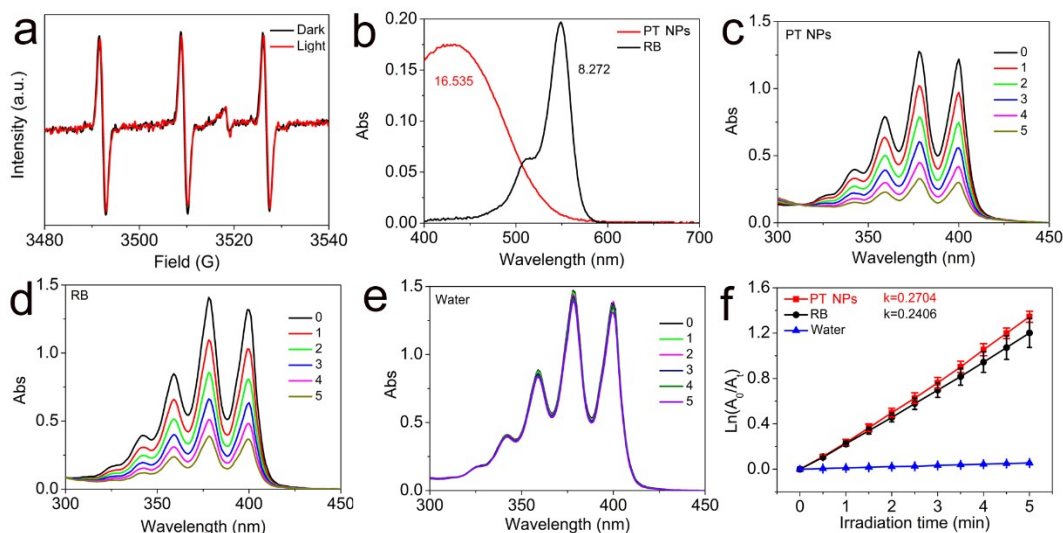

**Figure S5.** (a) The ESR signals of  $^1\text{O}_2$  obtained upon irradiation of pure water (without PT NPs) for 10 min in the presence of 2,2,6,6-Tetramethylpiperidine (800 nm). (b) The absorption spectra of PT NPs and Rose Bengal (RB) in aqueous solution. The absorption spectra of Na<sub>2</sub>-ADPA in the presence (c) PT NPs (d) RB, and (e) Pure water with different irradiation time. (f) Decrease of Na<sub>2</sub>-ADPA absorbance at 378 nm as a function of light irradiation time in the absence (blue line) and presence of PT NPs (red line) and RB (black line).  $A_0$  and  $A_t$  is the absorbance of ADPA at 378 nm before and after irradiation with white light (400-780 nm), respectively.

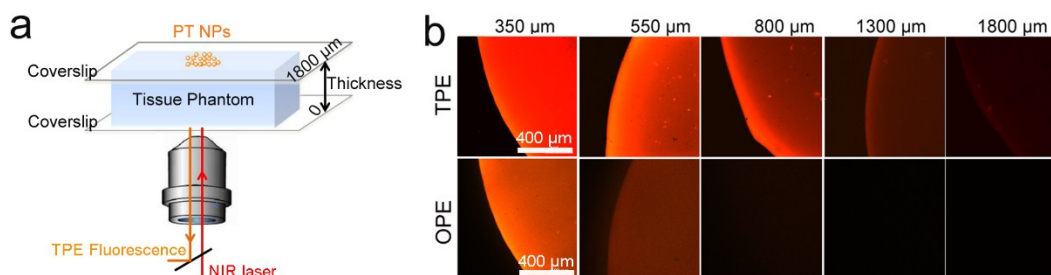

**Figure S6.** (a) Schematic of the setup for TPE fluorescence imaging of PT NPs in tissue phantom with different thickness. (b) Penetration depth of PT NPs for TPE (800 nm, up panel) and OPE (405 nm, down panel) fluorescence imaging in tissue phantom.
